# Supplementary material for: Highly efficient green organic light-emitting diodes containing luminescent tetrahedral copper(i) complexes
Source: Royal Society of Chemistry journal article supplement (doi:10.1039/c2tc00263a), 2012-11-15
Supplement: c2tc00263a.pdf [file c2tc00263a.pdf]

## Supplementary Information

### Highly Efficient Green Organic Light-Emitting Diodes Containing Luminescent Tetrahedral Copper(I) Complexes

Satoshi Igawa,<sup>a,b</sup> Masashi Hashimoto,<sup>a,b</sup> Isao Kawata,<sup>a,c</sup> Masataka Yashima,<sup>a,b</sup> Mikio Hoshino<sup>a</sup> and Masahisa Osawa<sup>\*a</sup>

<sup>a</sup>Luminescent Materials Laboratory, RIKEN, Hirosawa 2-1, Wako-Shi, 351-0198, Japan.

<sup>b</sup>Device Technology Development Headquarters, Ohta-ku, Tokyo 146-8501, Japan.

<sup>c</sup>Analysis Technology Center, Canon Incorporated, Ohta-ku, Tokyo 146-8501, Japan.

#### Contents

| Experimental Details                                                                                                        | Page            |
|-----------------------------------------------------------------------------------------------------------------------------|-----------------|
| <b>1.Synthetic Details</b>                                                                                                  | <b>S3 – S5</b>  |
| <b>2. NMR Experiments</b>                                                                                                   | <b>S5 – S14</b> |
| Fig. S1 <sup>1</sup> H NMR spectrum of dppb-F in CD <sub>2</sub> Cl <sub>2</sub> at 300 K.                                  |                 |
| Fig. S2 <sup>13</sup> C NMR spectrum of dppb-F in CD <sub>2</sub> Cl <sub>2</sub> at 300 K.                                 |                 |
| Fig. S3 <sup>19</sup> F { <sup>1</sup> H} NMR spectrum of dppb-F in CD <sub>2</sub> Cl <sub>2</sub> at 300 K.               |                 |
| Fig. S4 <sup>31</sup> P { <sup>1</sup> H} NMR spectrum of dppb-F in CD <sub>2</sub> Cl <sub>2</sub> at 300 K.               |                 |
| Fig. S5 <sup>1</sup> H NMR spectrum of dppb-CF <sub>3</sub> in CD <sub>2</sub> Cl <sub>2</sub> at 300 K.                    |                 |
| Fig. S6 <sup>13</sup> C NMR spectrum of dppb-CF <sub>3</sub> in CD <sub>2</sub> Cl <sub>2</sub> at 300 K.                   |                 |
| Fig. S7 <sup>19</sup> F { <sup>1</sup> H} NMR spectrum of dppb-CF <sub>3</sub> in CD <sub>2</sub> Cl <sub>2</sub> at 300 K. |                 |
| Fig. S8 <sup>31</sup> P { <sup>1</sup> H} NMR spectrum of dppb-CF <sub>3</sub> in CD <sub>2</sub> Cl <sub>2</sub> at 300 K. |                 |
| Fig. S9 <sup>1</sup> H NMR spectrum of <b>1</b> in CD <sub>2</sub> Cl <sub>2</sub> at 300 K.                                |                 |
| Fig. S10 <sup>13</sup> C NMR spectrum of <b>1</b> in CD <sub>2</sub> Cl <sub>2</sub> at 300 K.                              |                 |
| Fig. S11 <sup>31</sup> P { <sup>1</sup> H} NMR spectrum of <b>1</b> in CD <sub>2</sub> Cl <sub>2</sub> at 300 K.            |                 |
| Fig. S12 <sup>1</sup> H NMR spectrum of <b>2</b> in CD <sub>2</sub> Cl <sub>2</sub> at 300 K.                               |                 |
| Fig. S13 <sup>13</sup> C NMR spectrum of <b>2</b> in CD <sub>2</sub> Cl <sub>2</sub> at 300 K.                              |                 |
| Fig. S14 <sup>19</sup> F { <sup>1</sup> H} NMR spectrum of <b>2</b> in CD <sub>2</sub> Cl <sub>2</sub> at 300 K.            |                 |
| Fig. S15 <sup>31</sup> P { <sup>1</sup> H} NMR spectrum of <b>2</b> in CD <sub>2</sub> Cl <sub>2</sub> at 300 K.            |                 |
| Fig. S16 <sup>1</sup> H NMR spectrum of <b>3</b> in CD <sub>2</sub> Cl <sub>2</sub> at 300 K.                               |                 |
| Fig. S17 <sup>13</sup> C NMR spectrum of <b>3</b> in CD <sub>2</sub> Cl <sub>2</sub> at 300 K.                              |                 |
| Fig. S18 <sup>19</sup> F { <sup>1</sup> H} NMR spectrum of <b>3</b> in CD <sub>2</sub> Cl <sub>2</sub> at 300 K.            |                 |
| Fig. S19 <sup>31</sup> P { <sup>1</sup> H} NMR spectrum of <b>3</b> in CD <sub>2</sub> Cl <sub>2</sub> at 300 K.            |                 |

|                                                                                                                              |                |
|------------------------------------------------------------------------------------------------------------------------------|----------------|
| <b>3. Crystal Structure Determination</b>                                                                                    | <b>S15</b>     |
| <b>Table S1</b> Crystallographic data for <b>1 – 3</b>                                                                       |                |
| <b>4. Cyclic Voltammogram Measurement</b>                                                                                    | <b>S16</b>     |
| <b>Fig. S20</b> Cyclic voltammogram of diphosphine ligands (dppb, dppb-F, and dppb-CF <sub>3</sub> )                         |                |
| <b>Fig. S21</b> Cyclic voltammogram of Cu(I) complexes ( <b>1 – 3</b> ).                                                     |                |
| <b>5. Theoretical Studies</b>                                                                                                | <b>S17-S23</b> |
| <b>Fig. S22</b> NTO pairs for the lowest triplet excited state of <b>1</b> in the optimized T <sub>1</sub> geometry.         |                |
| <b>Fig. S23</b> NTO pairs for the lowest triplet excited state of <b>2</b> in the optimized T <sub>1</sub> geometry.         |                |
| <b>Table S2</b> Compositions of hole and electron in T <sub>1</sub> of <b>3</b> . (optimized T <sub>1</sub> geometry in THF) |                |
| <b>Table S3</b> Compositions of hole and electron in T <sub>1</sub> of <b>1</b> . (optimized T <sub>1</sub> geometry in THF) |                |
| <b>Table S4</b> Compositions of hole and electron in T <sub>1</sub> of <b>2</b> . (optimized T <sub>1</sub> geometry in THF) |                |
| <b>Fig. S24</b> NTO pairs for the lowest triplet excited state of <b>1</b> in the optimized S <sub>0</sub> geometry.         |                |
| <b>Fig. S25</b> NTO pairs for the lowest triplet excited state of <b>2</b> in the optimized S <sub>0</sub> geometry.         |                |
| <b>Table S5</b> Compositions of hole and electron in T <sub>1</sub> of <b>3</b> . (optimized S <sub>0</sub> geometry in THF) |                |
| <b>Table S6</b> Compositions of hole and electron in T <sub>1</sub> of <b>1</b> . (optimized S <sub>0</sub> geometry in THF) |                |
| <b>Table S7</b> Compositions of hole and electron in T <sub>1</sub> of <b>2</b> . (optimized S <sub>0</sub> geometry in THF) |                |
| <b>Fig. S26</b> NTO pairs for the first singlet excited state of <b>1</b> in the optimized S <sub>0</sub> geometry.          |                |
| <b>Fig. S27</b> NTO pairs for the first singlet excited state of <b>2</b> in the optimized S <sub>0</sub> geometry.          |                |
| <b>Table S8</b> Compositions of hole and electron in S <sub>1</sub> of <b>3</b> (optimized S <sub>0</sub> geometry in THF)   |                |
| <b>Table S9</b> Compositions of hole and electron in S <sub>1</sub> of <b>1</b> (optimized S <sub>0</sub> geometry in THF)   |                |
| <b>Table S10</b> Compositions of hole and electron in S <sub>1</sub> of <b>2</b> (optimized S <sub>0</sub> geometry in THF)  |                |
| <b>6. The angular distribution of light emission from OLEDs containing <b>1 – 3</b></b>                                      | <b>S23-S24</b> |
| <b>Fig. S28</b> The angular distribution of light emission from the device containing <b>1</b> .                             |                |
| <b>Fig. S29</b> The angular distribution of light emission from the device containing <b>2</b> .                             |                |
| <b>Fig. S30</b> The angular distribution of light emission from the device containing <b>3</b> .                             |                |
| <b>7. References</b>                                                                                                         | <b>S24</b>     |

## Experimental Details

### 1. Synthetic Details

**Materials.** 1,2-Bis(dichlorophosphino)benzene and magnesium were obtained from Wako Pure Chemical Industries, Ltd. 3,5-Difluorophenylmagnesium bromide and bromo(dimethylsulfide)copper(I) ( $\text{CuBr}\cdot\text{SMe}_2$ ) were purchased from Sigma-Aldrich. 1-Bromo-3,5-bis(trifluoromethyl)benzene was obtained from TCI. Co., Ltd. Iodine was purchased from Kanto Chemical Co., Inc. Di-[4-(N,N-ditolyl-amino)-phenyl]cyclohexane (TAPC), 1,3-bis(carbazol-9-yl)benzene (mCP), and tris(2,4,6-trimethyl-3-(pyridine-3-yl)phenyl)borane (3TPYMB) were purchased from Lumitec Corp. Potassium diphenylbis(pyrazol-1-yl)borate ( $\text{KBpz}_2\text{ph}_2$ ) and  $[(\text{dppb})\text{CuBr}]_2$  were prepared according to literature procedures.<sup>1,2</sup>

**Synthesis of dppb-F.** A solution of 3,5-difluorophenyl magnesium bromide in THF (0.5M, 50 mL, 25 mmol) was added dropwise to a solution of 1,2-bis(dichlorophosphino)benzene (1.0 g, 3.57 mol) in THF (20 mL) at 0 °C. The reaction mixture was stirred at room temperature for 4 h. A solution of saturated aqueous  $\text{NH}_4\text{Cl}$  (100 mL) was added to the reaction mixture, and extracted with  $\text{CH}_2\text{Cl}_2$  (3  $\times$  60 mL). The combined organic extracts were washed with saturated aqueous NaCl (150 mL) and dried over  $\text{MgSO}_4$ . The drying agent was removed by filtration, and the solvent was removed *in vacuo* to give a pale yellow oil. The residue was purified by column chromatography on silica gel (*n*-hexane/ $\text{CH}_2\text{Cl}_2$ , 2:1) to afford dppb-F (933 mg, 47%) as a colorless solid.  $^1\text{H}$  NMR (500 MHz,  $\text{CD}_2\text{Cl}_2$ , 300 K):  $\delta$  6.69 (m, 8H), 6.79 (m, 4H), 7.11 (m, 4H), 7.43 (m, 2H);  $^{13}\text{C}$  NMR (125 MHz,  $\text{CD}_2\text{Cl}_2$ , 300 K):  $\delta$  104.89, (t,  $J_{\text{C-P}} = 25.2$  Hz), 116.41 (m), 130.82, 134.52 (t,  $J_{\text{C-P}} = 3.4$  Hz), 140.26 (m), 141.54 (t,  $J_{\text{C-P}} = 10.9$  Hz), 162.21 (m), 164.12 (m);  $^{19}\text{F}$  NMR (377 MHz,  $\text{CD}_2\text{Cl}_2$ , 300 K):  $\delta$  -111.66;  $^{31}\text{P}$  { $^1\text{H}$ } NMR (202 MHz,  $\text{CD}_2\text{Cl}_2$ , 300 K):  $\delta$  -9.60. Anal. calcd. for  $\text{C}_{30}\text{H}_{16}\text{F}_8\text{P}_2$  (%): C, 61.03; H, 2.73. Found: C, 61.29; H, 2.81.

**Synthesis of dppb-CF<sub>3</sub>.** A solution of 3,5-bis(trifluoromethyl)phenyl magnesium bromide was prepared from magnesium (3.0 g, 125 mmol) and 1-bromo-3,5-bis(trifluoromethyl)benzene (36.5 g, 125 mmol) in THF (100 mL), and then cooled to 0 °C. A solution of 1,2-bis(dichlorophosphino)benzene (5.0 g, 16.8 mol) in THF (20 mL) was added dropwise to the solution of 3,5-bis(trifluoromethyl)phenyl magnesium bromide. The reaction mixture was stirred at room temperature for 4 h. A solution of saturated aqueous  $\text{NH}_4\text{Cl}$  (100 mL) was added to the reaction mixture, and then the mixture was extracted with  $\text{CH}_2\text{Cl}_2$  (3  $\times$  80 mL). The combined organic extracts were washed with saturated aqueous NaCl (150 mL) and dried over  $\text{MgSO}_4$ . The drying agent was removed by filtration, and the solvent was removed *in vacuo* to give a pale yellow oil. The residue was purified by column chromatography on silica gel (*n*-hexane/ $\text{CH}_2\text{Cl}_2$ , 2:1) to

afford dppb-CF<sub>3</sub> (12.4 g, 74%) as a colorless solid. <sup>1</sup>H NMR (500 MHz, CD<sub>2</sub>Cl<sub>2</sub>, 300 K): δ 7.23 (m, 2H), 7.54 (m, 2H), 7.03 (m, 8H), 7.90 (m, 4H); <sup>13</sup>C NMR (125 MHz, CD<sub>2</sub>Cl<sub>2</sub>, 300 K): δ 122.93 (q, *J*<sub>C-F</sub> = 271.5 Hz), 123.87, 131.93, 132.40 (qt, *J*<sub>C-F</sub> = 33.7, *J*<sub>C-P</sub> = 3.2 Hz), 133.50 (2C), 134.73 (t, *J*<sub>C-P</sub> = 3.1 Hz), 135.09 (t, *J*<sub>C-P</sub> = 5.5 Hz), 140.41 (t, *J*<sub>C-P</sub> = 11.4 Hz); <sup>19</sup>F NMR (377 MHz, CD<sub>2</sub>Cl<sub>2</sub>, 300 K): δ -65.92. <sup>31</sup>P {<sup>1</sup>H} NMR (202 MHz, CD<sub>2</sub>Cl<sub>2</sub>, 300 K) δ -11.46. Anal. calcd. for C<sub>38</sub>H<sub>16</sub>F<sub>24</sub>P<sub>2</sub> (%): C, 46.08; H, 1.63. Found: C, 46.42; H, 1.89.

**Cu(dppb)(pz<sub>2</sub>Bph<sub>2</sub>) (1).** KBpz<sub>2</sub>ph<sub>2</sub> (338 mg, 0.5 mmol) was added to a solution of [(dppb)CuBr]<sub>2</sub> (236 mg, 0.2 mmol) in THF (15 mL). The reaction mixture was stirred at room temperature for 2 h. The reaction mixture was filtered, and the solvent was removed *in vacuo* to give a pale yellow powder. The residue was purified by recrystallization from CH<sub>2</sub>Cl<sub>2</sub> / *n*-hexane to give yellow crystals (268 mg, 83%). <sup>1</sup>H NMR (500 MHz, CD<sub>2</sub>Cl<sub>2</sub>, 300 K) δ 6.02 (t, 2H, *J* = 2.0 Hz), 6.70 (m, 4H), 6.82 (t, 4H, *J* = 7.0 Hz), 6.87 (m, 2H), 6.89 (m, 2H), 7.02-7.06 (m, 8H), 7.23 (m, 10H), 7.32 (t, 4H, *J* = 7.0 Hz), 7.41-7.46 (m, 4H); <sup>13</sup>C NMR (125 MHz, CD<sub>2</sub>Cl<sub>2</sub>, 300 K) δ 102.72, 125.49, 126.68, 128.42 (t, *J*<sub>C-P</sub> = 4.4 Hz), 129.20, 130.39, 133.17 (t, *J*<sub>C-P</sub> = 8.2 Hz), 133.71, 134.14 (t, *J*<sub>C-P</sub> = 14.2 Hz), 134.85 (t, *J*<sub>C-P</sub> = 3.9 Hz), 136.98, 141.63, 143.24 (t, *J*<sub>C-P</sub> = 32.5 Hz); <sup>31</sup>P {<sup>1</sup>H} NMR (202 MHz, CD<sub>2</sub>Cl<sub>2</sub>, 300 K) δ -8.71. Anal. calcd. for C<sub>48</sub>H<sub>40</sub>BCuN<sub>4</sub>P<sub>2</sub> (%): C, 71.25; H, 4.98; N, 6.92. Found: C, 71.03; H, 5.10; N, 6.72.

**Cu(dppb-F)(pz<sub>2</sub>Bph<sub>2</sub>) (2).** A solution of dppb-F (354 mg, 0.6 mmol) in THF (20 mL) was added dropwise to a solution of CuBr·SMe<sub>2</sub> (124 mg, 0.6 mmol) in THF (10 mL). The reaction mixture was stirred at room temperature for 1 h. A solution of KBpz<sub>2</sub>ph<sub>2</sub> (146 mg, 0.73 mmol) in THF (10 mL) was added to the reaction mixture, and then it was stirred at room temperature for 1 h. The solvent was removed from the reaction mixture *in vacuo* to give a pale yellow oil. The residue was purified by recrystallization from CH<sub>2</sub>Cl<sub>2</sub> / *n*-hexane to give yellow crystals (406 mg, 71%). <sup>1</sup>H NMR (500 MHz, CD<sub>2</sub>Cl<sub>2</sub>, 300 K): δ 6.16 (m, 2H), 6.59 (m, 8H), 6.68 (m, 4H), 6.86 (m, 4H), 6.92 (m, 6H), 6.97 (m, 2H), 7.33 (m, 2H), 7.44 (m, 2H), 7.61 (m, 2H); <sup>13</sup>C NMR (125 MHz, CD<sub>2</sub>Cl<sub>2</sub>, 300 K): δ 103.36, 105.74 (t, *J*<sub>C-P</sub> = 25.1 Hz), 124.74, 115.79 (dt, *J*<sub>C-F</sub> = 26.0, *J*<sub>C-P</sub> = 8.7 Hz), 125.68, 126.87, 132.10, 133.47, 135.01 (t, *J*<sub>C-P</sub> = 3.6 Hz), 136.55 (m), 137.85, 140.71 (t, *J*<sub>C-P</sub> = 33.2 Hz), 141.51, 161.13 (dt, *J*<sub>C-F</sub> = 11.8, *J*<sub>C-P</sub> = 6.6 Hz), 164.13 (dt, *J*<sub>C-F</sub> = 11.8, *J*<sub>C-P</sub> = 6.6 Hz); <sup>19</sup>F NMR (377 MHz, CD<sub>2</sub>Cl<sub>2</sub>, 300 K): δ -111.47; <sup>31</sup>P {<sup>1</sup>H} NMR (202 MHz, CD<sub>2</sub>Cl<sub>2</sub>, 300 K) δ -7.98. Anal. calcd. for C<sub>48</sub>H<sub>32</sub>BCuF<sub>8</sub>N<sub>4</sub>P<sub>2</sub> (%): C, 60.49; H, 3.38; N, 5.88. Found: C, 60.71; H, 3.27; N, 5.69.

**[Cu(dppb-CF<sub>3</sub>)(pz<sub>2</sub>Bph<sub>2</sub>) (3).** A solution of dppb-CF<sub>3</sub> (600 mg, 0.6 mmol) in THF (20 mL) was added dropwise to a solution of CuBr·SMe<sub>2</sub> (124 mg, 0.6 mmol) in THF (10 mL). The reaction mixture was stirred at room temperature for 1 h. A solution of KBpz<sub>2</sub>ph<sub>2</sub> (146 mg, 0.73 mmol) in

THF (10 mL) was added to the reaction mixture, which was then stirred at room temperature for 1 h. The solvent was removed *in vacuo* to give a pale yellow oil, which was purified by recrystallization from CH<sub>2</sub>Cl<sub>2</sub> / *n*-hexane to give yellow crystals (416 mg, 51%). <sup>1</sup>H NMR (500 MHz, CD<sub>2</sub>Cl<sub>2</sub>, 300 K): δ 6.24 (t, 2H, *J* = 2.0 Hz), 6.57 (m, 4H), 6.76 (m, 6H), 7.06 (d, 2H, *J* = 2.0 Hz), 7.37 (m, 2H), 7.39 (d, 2H, *J* = 2.0 Hz), 7.55 (m, 8H), 7.69 (m, 2H), 7.91 (m, 4H); <sup>13</sup>C NMR (125 MHz, CD<sub>2</sub>Cl<sub>2</sub>, 300 K): δ 119.55, 122.81 (q, *J*<sub>C-F</sub> = 271.5 Hz), 124.74, 125.81, 126.66, 132.58 (qt, *J*<sub>C-F</sub> = 33.7, *J*<sub>C-P</sub> = 4.6 Hz), 132.87 (2C), 132.98 133.28, 135.02 (t, *J*<sub>C-P</sub> = 13.2 Hz), 135.09 (t, *J*<sub>C-P</sub> = 4.1 Hz), 138.47, 139.88 (t, *J*<sub>C-P</sub> = 33.6 Hz), 141.62; <sup>19</sup>F NMR (377 MHz, CD<sub>2</sub>Cl<sub>2</sub>, 300 K): δ -66.61; <sup>31</sup>P {<sup>1</sup>H} NMR (202 MHz, CD<sub>2</sub>Cl<sub>2</sub>, 300 K) δ -12.01. Anal. calcd. for C<sub>56</sub>H<sub>32</sub>BCuF<sub>24</sub>N<sub>4</sub>P<sub>2</sub> (%): C, 49.71; H, 2.38; N, 4.14. Found: C, 49.65; H, 2.21; N, 4.32.

## 2. NMR Experiments

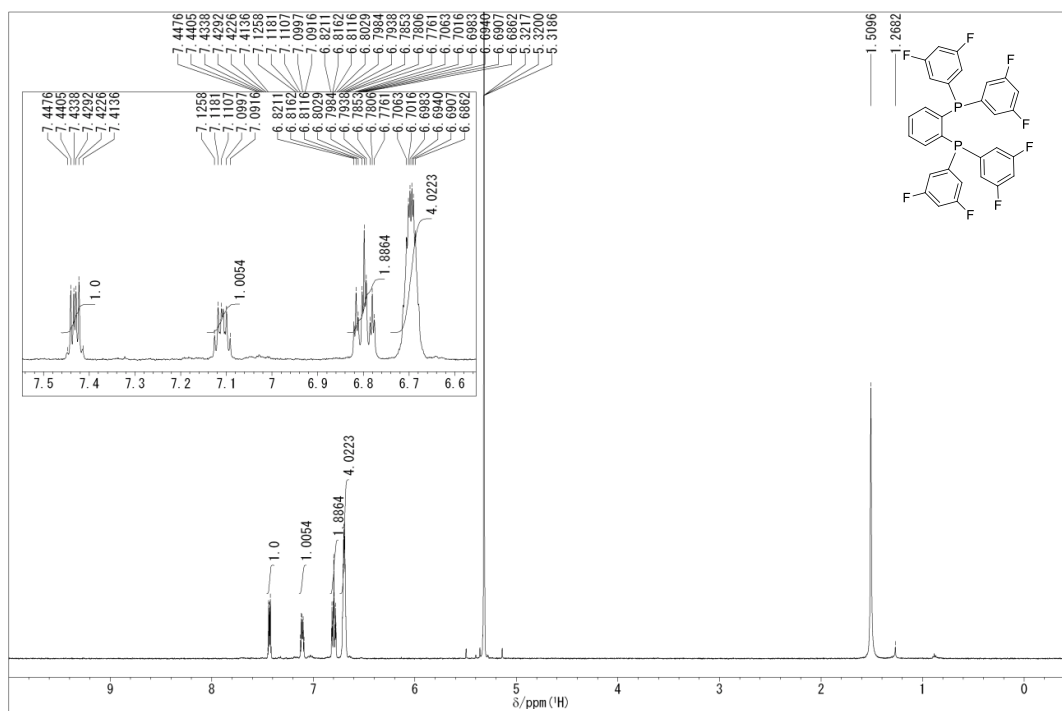

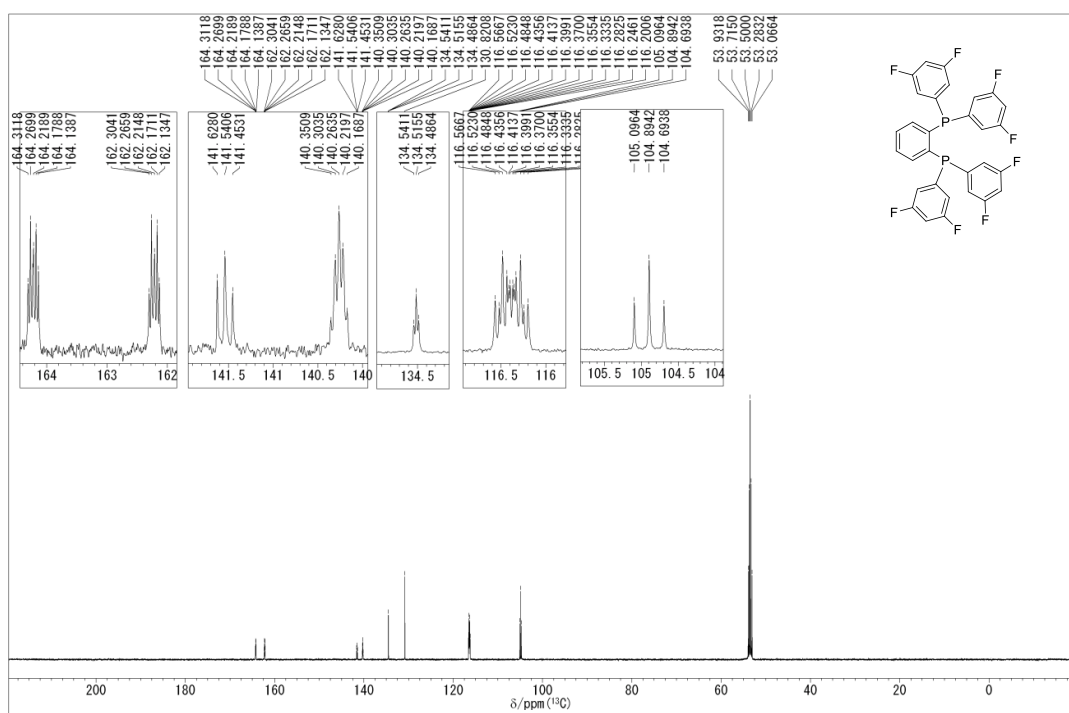

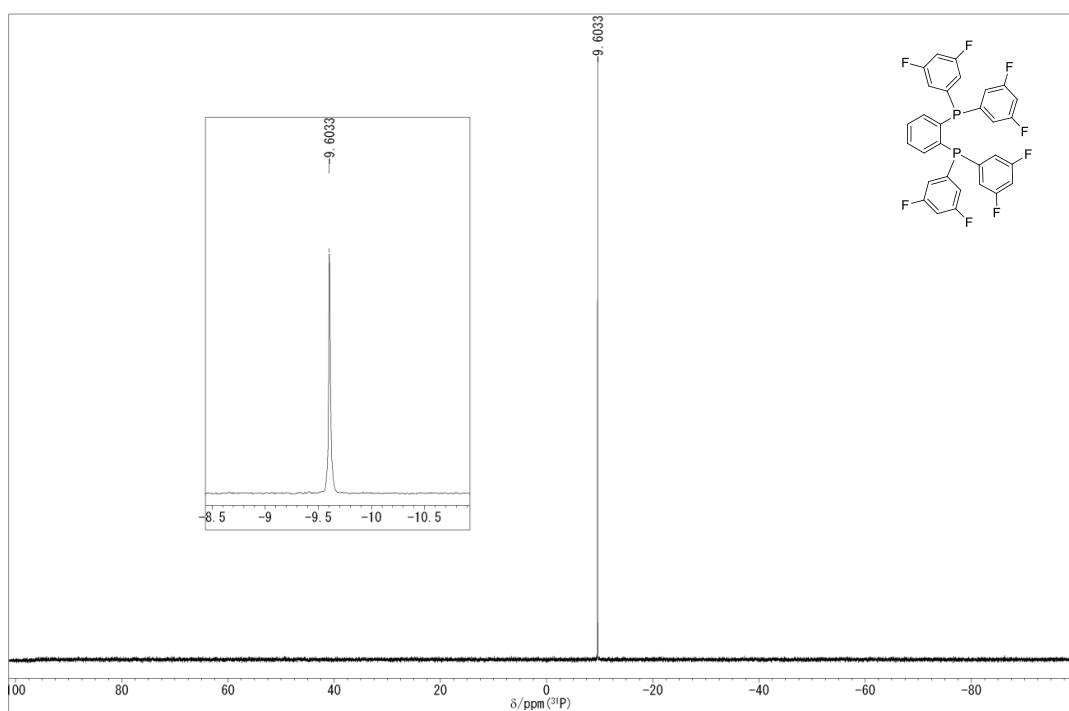

**Fig. S4**  $^{31}\text{P}$   $\{^1\text{H}\}$  NMR spectrum of dppb-F in  $\text{CD}_2\text{Cl}_2$  at 300 K.

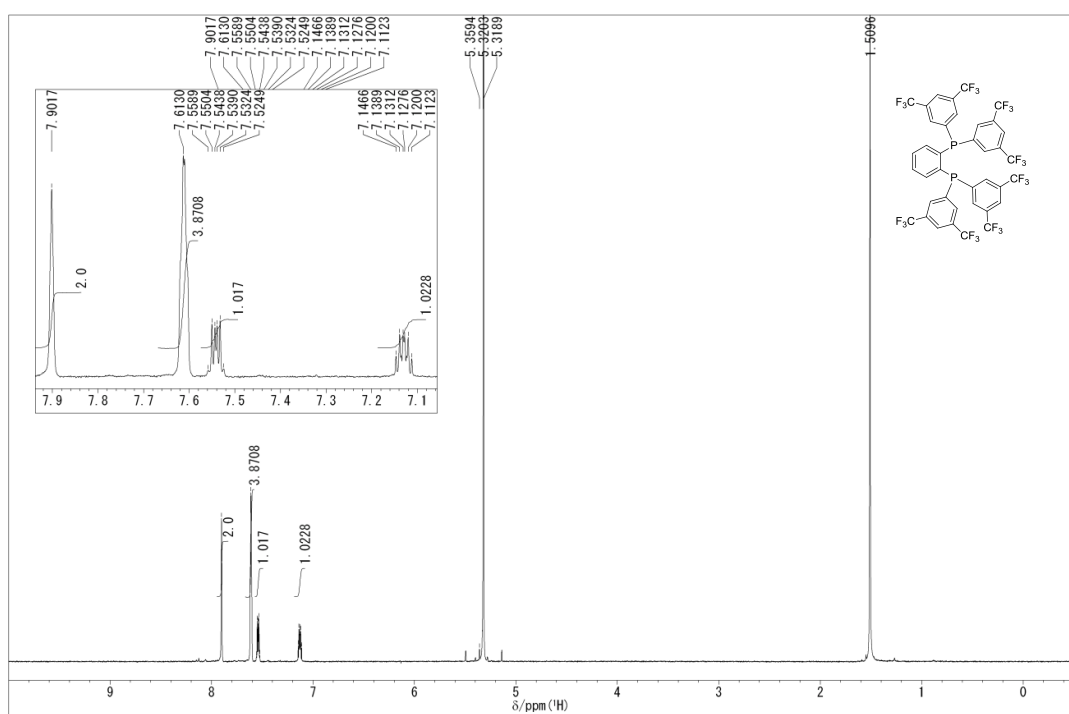

**Fig. S5**  $^1\text{H}$  NMR spectrum of dppb- $\text{CF}_3$  in  $\text{CD}_2\text{Cl}_2$  at 300 K





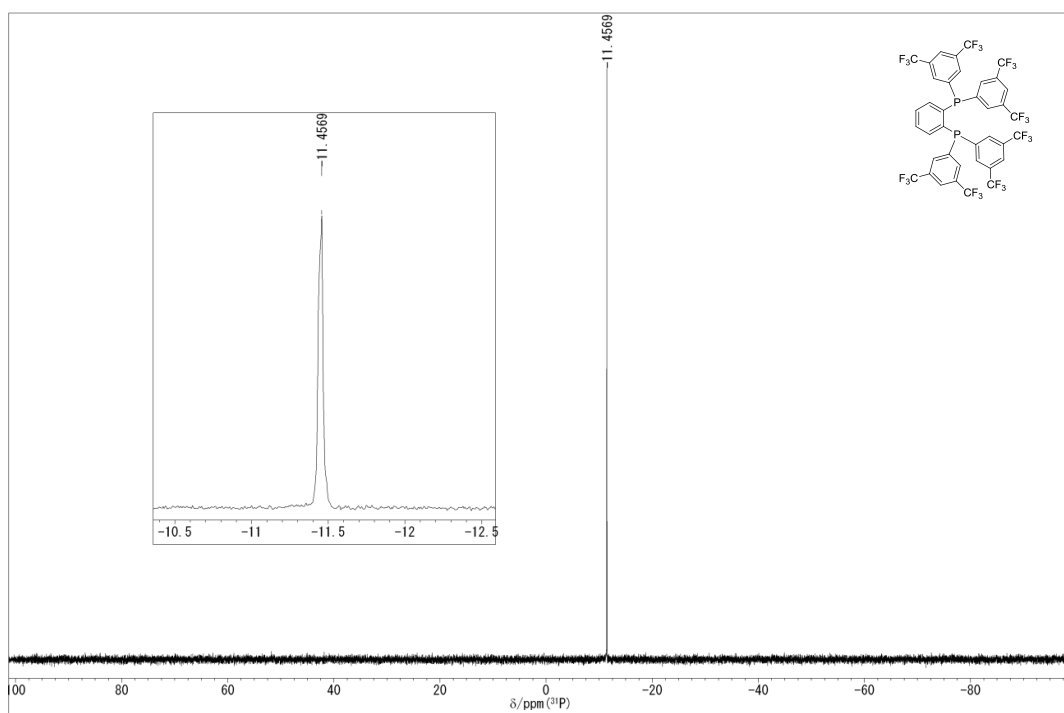

Fig. S8  $^{31}\text{P}$   $\{^1\text{H}\}$  NMR spectrum of dppb- $\text{CF}_3$  in  $\text{CD}_2\text{Cl}_2$  at 300 K.

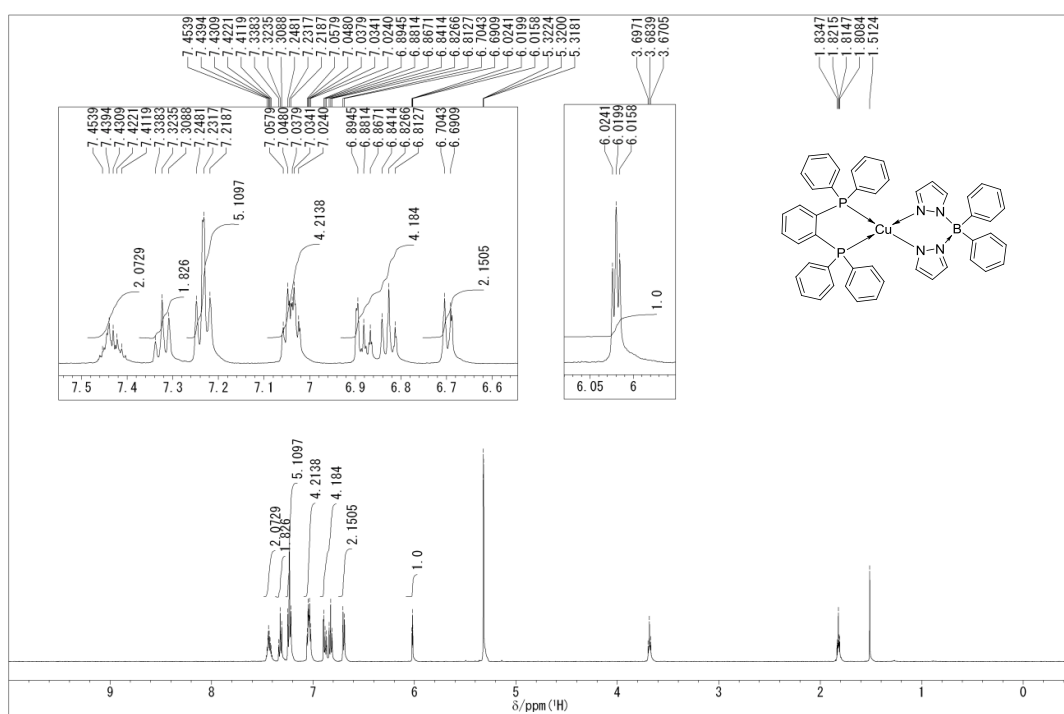

Fig. S9  $^1\text{H}$  NMR spectrum of **1** in  $\text{CD}_2\text{Cl}_2$  at 300 K.



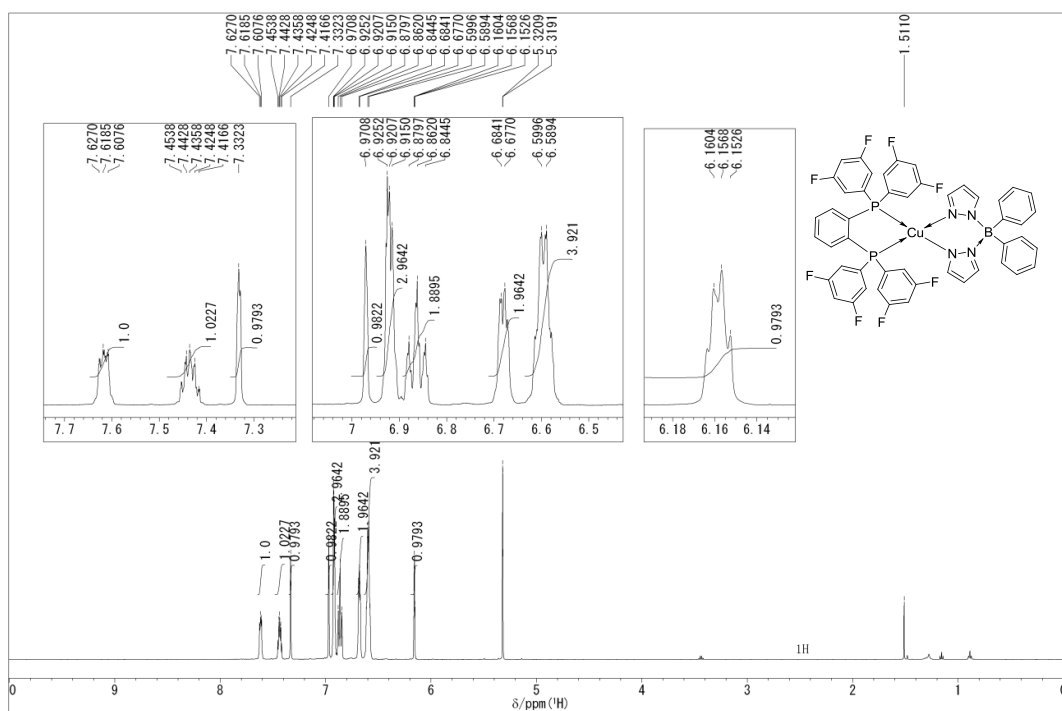

**Fig. S12**  $^1\text{H}$  NMR spectrum of **2** in  $\text{CD}_2\text{Cl}_2$  at 300 K.

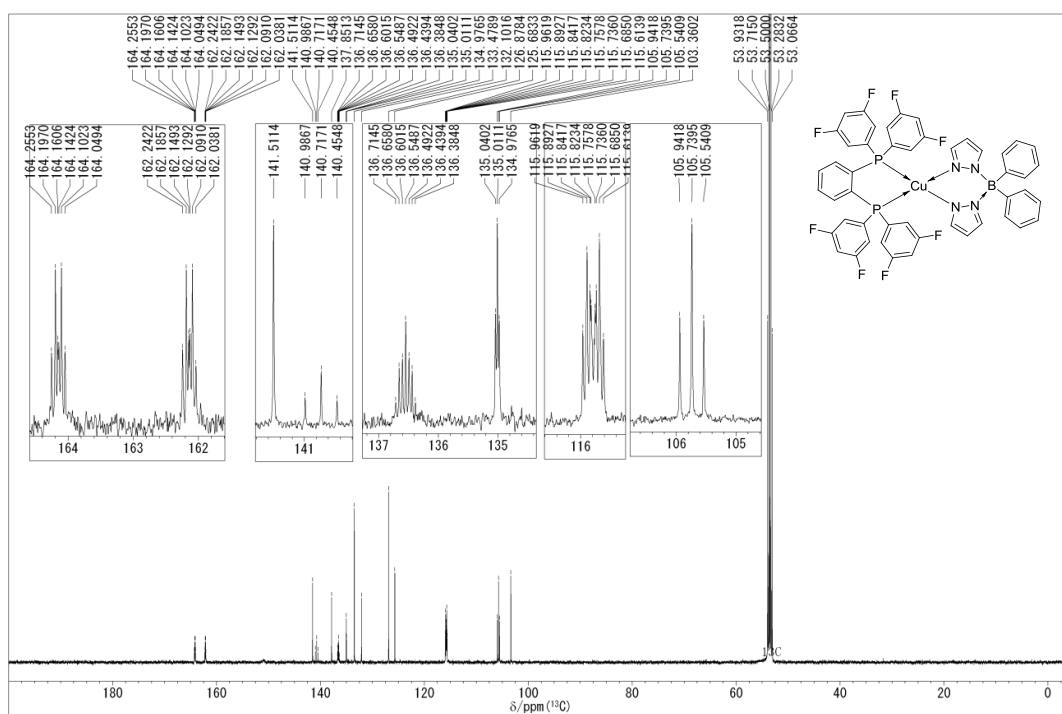

**Fig. S13**  $^{13}\text{C}$  NMR spectrum of **2** in  $\text{CD}_2\text{Cl}_2$  at 300 K.

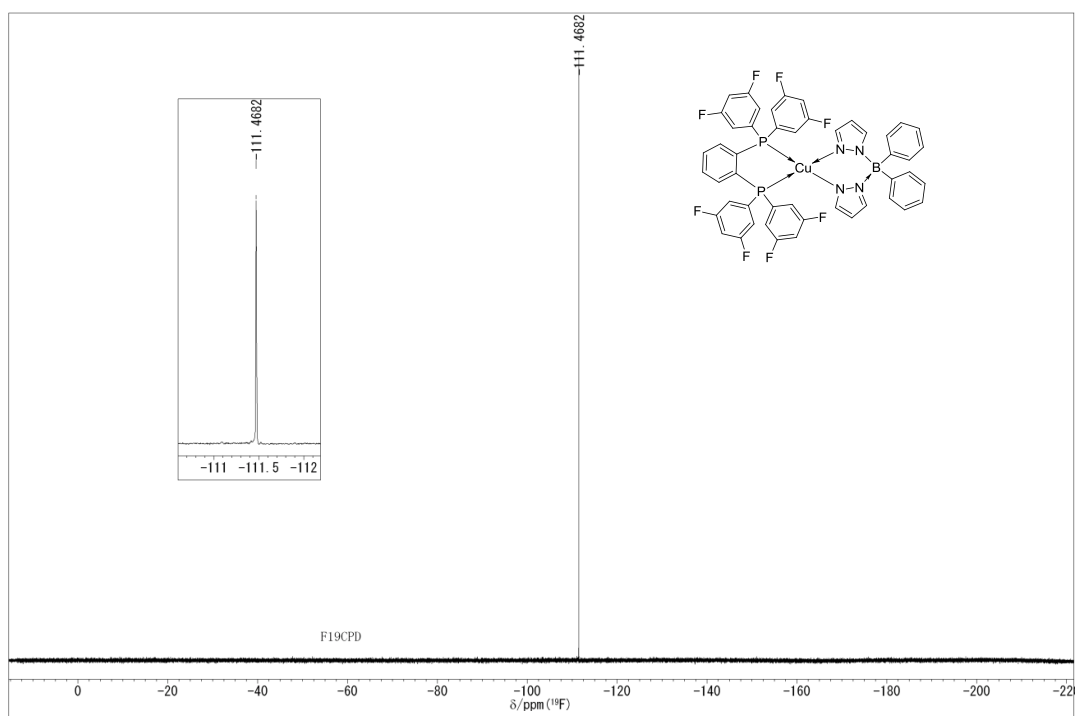

**Fig. S14**  $^{19}\text{F}$   $\{^1\text{H}\}$  NMR spectrum of **2** in  $\text{CD}_2\text{Cl}_2$  at 300 K.

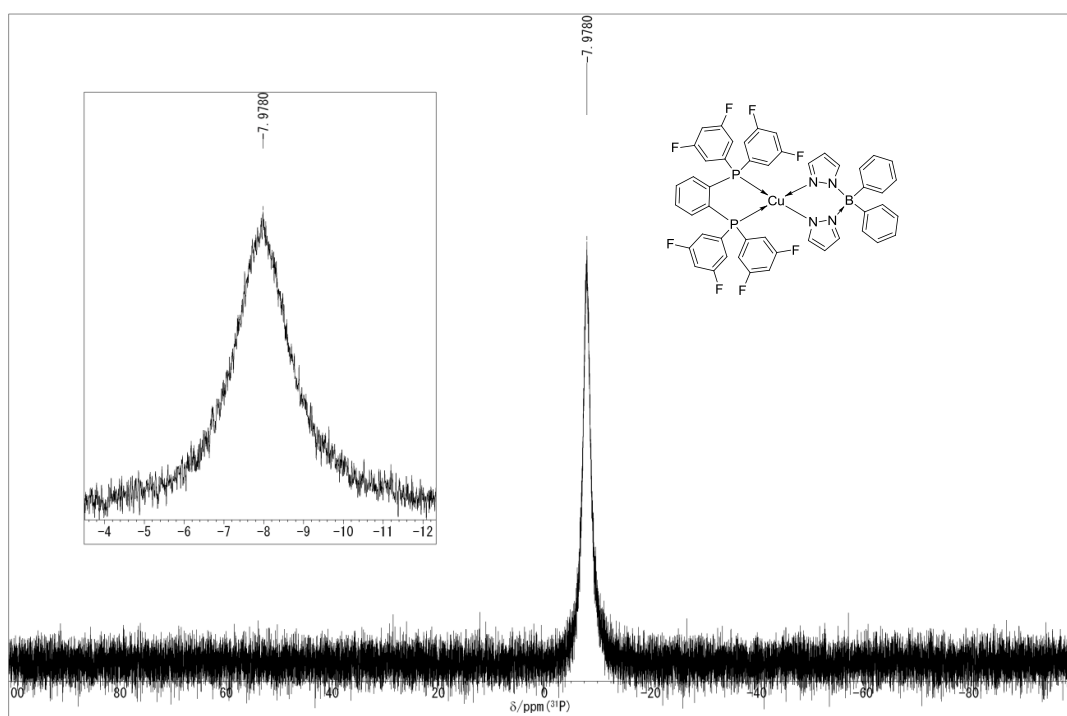

**Fig. S15**  $^{31}\text{P}$   $\{^1\text{H}\}$  NMR spectrum of **2** in  $\text{CD}_2\text{Cl}_2$  at 300 K.



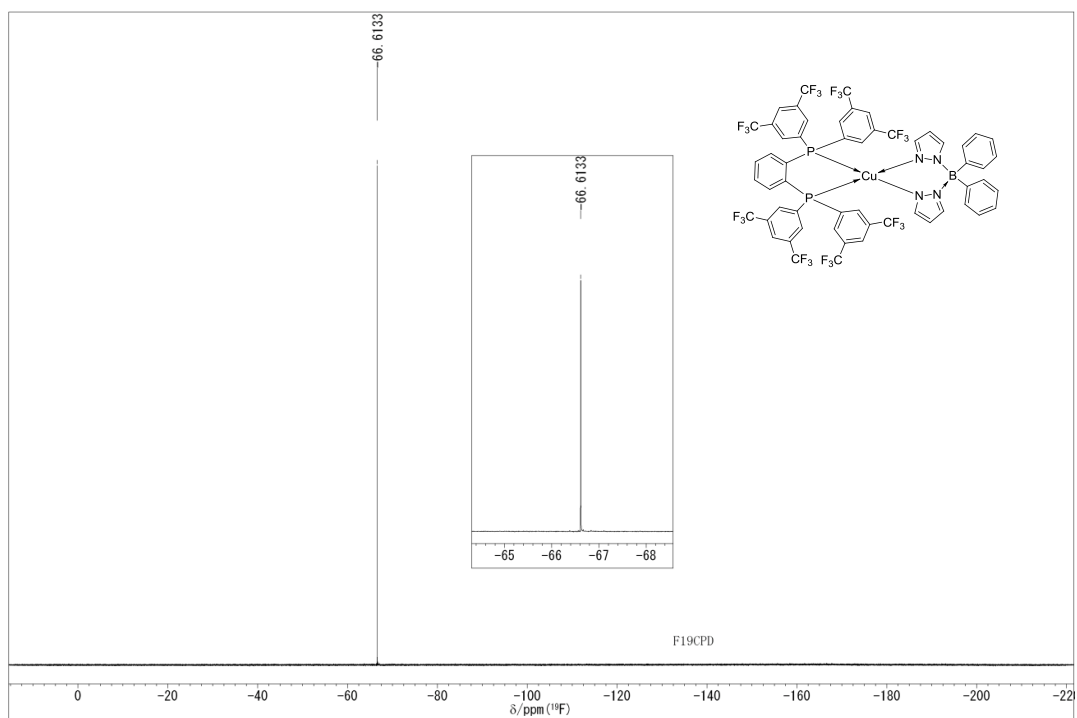

**Fig. S18**  $^{19}\text{F}$   $\{^1\text{H}\}$  NMR spectrum of **3** in  $\text{CD}_2\text{Cl}_2$  at 300 K.

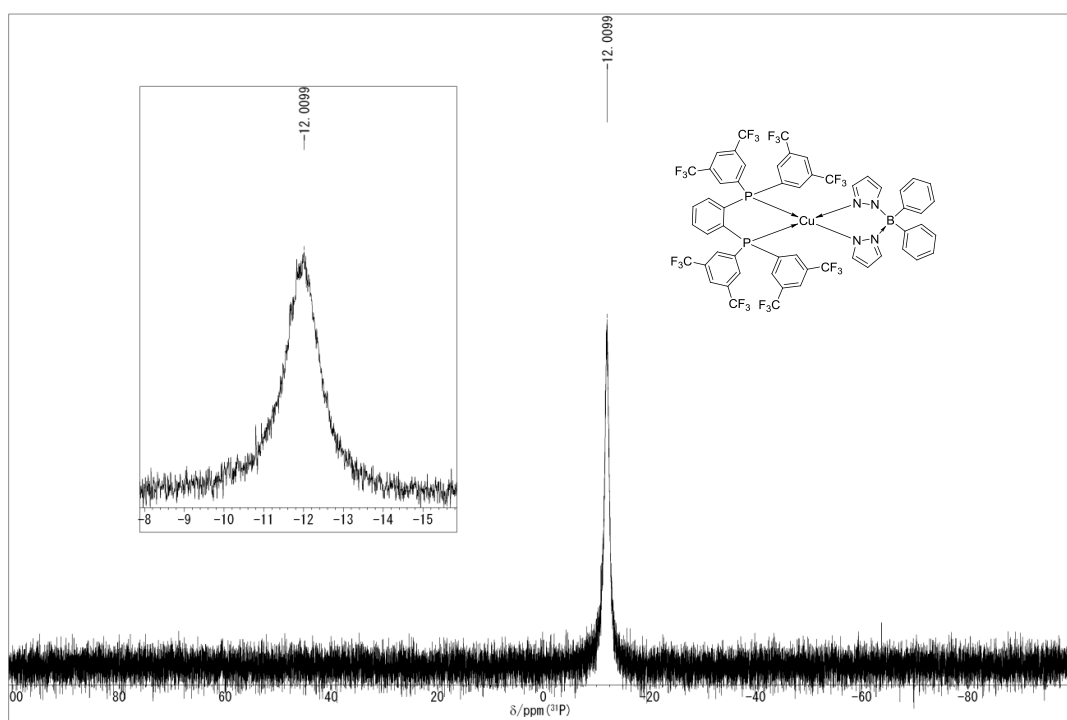

**Fig. S19**  $^{31}\text{P}$   $\{^1\text{H}\}$  NMR spectrum of **3** in  $\text{CD}_2\text{Cl}_2$  at 300 K.

### 3. Crystal Structure Determination

**Table S1** Crystallographic data for **1–3**

|                                                                           | <b>1</b>                                                                                         | <b>2</b>                                                                        | <b>3</b>                                                                         |
|---------------------------------------------------------------------------|--------------------------------------------------------------------------------------------------|---------------------------------------------------------------------------------|----------------------------------------------------------------------------------|
| formula                                                                   | C <sub>48</sub> H <sub>40</sub> BCuN <sub>4</sub> P <sub>2</sub> CH <sub>2</sub> Cl <sub>2</sub> | C <sub>48</sub> H <sub>32</sub> BCuF <sub>8</sub> N <sub>4</sub> P <sub>2</sub> | C <sub>56</sub> H <sub>32</sub> BCuF <sub>24</sub> N <sub>4</sub> P <sub>2</sub> |
| formula weight                                                            | 894.06                                                                                           | 953.07                                                                          | 1353.15                                                                          |
| cryst syst                                                                | monoclinic                                                                                       | triclinic                                                                       | orthorhmbic                                                                      |
| space group                                                               | <i>P</i> 2 <sub>1</sub> / <i>c</i>                                                               | <i>P</i> 1̄                                                                     | <i>Pbca</i>                                                                      |
| <i>a</i> / Å                                                              | 9.6512 (8)                                                                                       | 12.4467 (2)                                                                     | 12.6861 (16)                                                                     |
| <i>b</i> / Å                                                              | 22.813 (2)                                                                                       | 13.2352 (11)                                                                    | 20.390 (3)                                                                       |
| <i>c</i> / Å                                                              | 19.5335 (17)                                                                                     | 13.7652 (9)                                                                     | 44.345 (6)                                                                       |
| <i>α</i> / deg                                                            | -                                                                                                | 89.778 (4)                                                                      | -                                                                                |
| <i>β</i> / deg                                                            | 93.960 (2)                                                                                       | 70.725 (4)                                                                      | -                                                                                |
| <i>γ</i> / deg                                                            | -                                                                                                | 78.648(3)                                                                       | -                                                                                |
| <i>V</i> / Å <sup>3</sup>                                                 | 4290.4(6)                                                                                        | 2094.0(3)                                                                       | 11471(2)                                                                         |
| <i>Z</i>                                                                  | 4                                                                                                | 2                                                                               | 8                                                                                |
| <i>d</i> <sub>calcd</sub> / g cm <sup>-3</sup>                            | 1.384                                                                                            | 1.512                                                                           | 1.567                                                                            |
| <i>T</i> / K                                                              | 90.0(1)                                                                                          | 90.0(1)                                                                         | 90.0(1)                                                                          |
| radiation                                                                 | Mo Kα                                                                                            | Mo Kα                                                                           | Mo Kα                                                                            |
|                                                                           | (λ = 0.71073 Å)                                                                                  | (λ = 0.71073 Å)                                                                 | (λ = 0.71073 Å)                                                                  |
| <i>μ</i> / cm <sup>-1</sup>                                               | 0.749                                                                                            | 0.675                                                                           | 0.557                                                                            |
| diffractometer                                                            | Rigaku AFC-8                                                                                     | Rigaku AFC-8                                                                    | Rigaku AFC-8                                                                     |
| max 2θ / deg                                                              | 60                                                                                               | 60                                                                              | 60                                                                               |
| reflns colld                                                              | 115869                                                                                           | 29243                                                                           | 75702                                                                            |
| indep reflns                                                              | 13634                                                                                            | 12050                                                                           | 16699                                                                            |
|                                                                           | ( <i>R</i> <sub>int</sub> = 0.061)                                                               | ( <i>R</i> <sub>int</sub> = 0.023)                                              | ( <i>R</i> <sub>int</sub> = 0.0755)                                              |
| no. of param refined                                                      | 574                                                                                              | 7578                                                                            | 820                                                                              |
| <i>R</i> <sub>1</sub> , <i>wR</i> <sub>2</sub> ( <i>I</i> > 2σ <i>I</i> ) | 0.0677, 0.1658                                                                                   | 0.0297, 0.0802                                                                  | 0.0671, 0.1561                                                                   |
| <i>S</i>                                                                  | 1.120                                                                                            | 1.087                                                                           | 1.132                                                                            |

#### 4. Cyclic Voltammogram Measurement

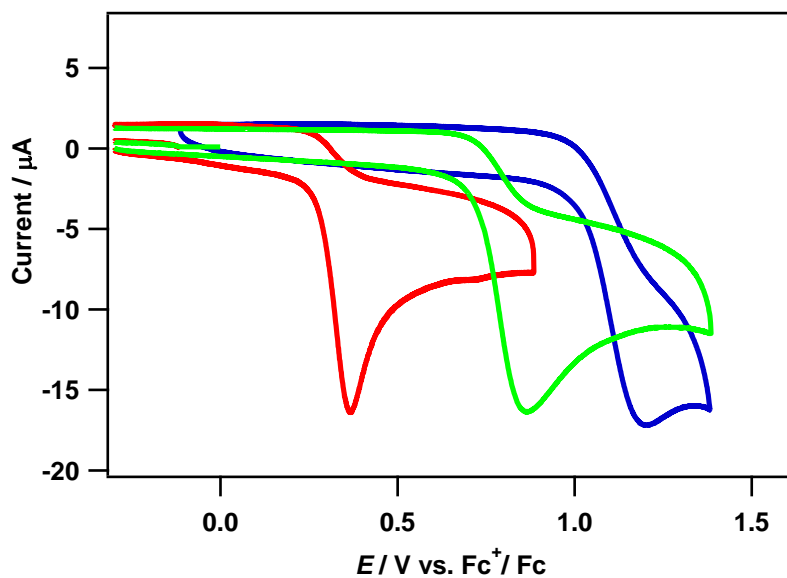

**Fig. S20** Cyclic voltammogram of dppb (red), dppb-F (green), and dppb-CF<sub>3</sub> (blue) in CH<sub>3</sub>CN at 293 K.

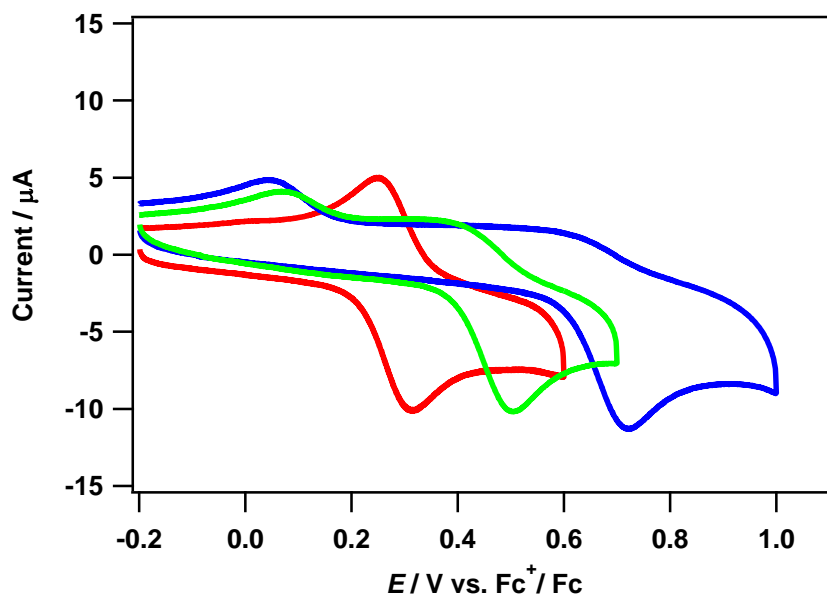

**Fig. S21** Cyclic voltammogram of **1** (red), **2** (green), and **3** (blue) in CH<sub>3</sub>CN at 293 K.



## 5. Theoretical Studies

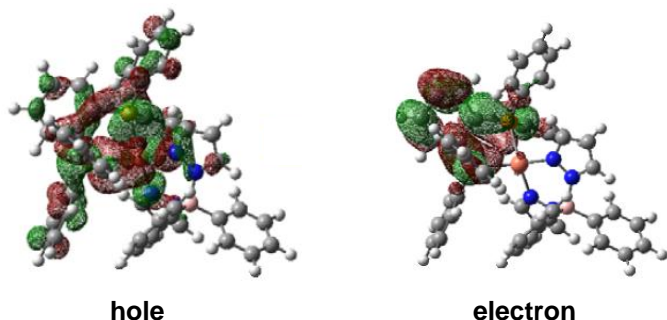

**Fig. S22** NTO pairs for the lowest triplet excited state of **1** in the optimized  $T_1$  geometry. The generation probabilities are 99.5 %.

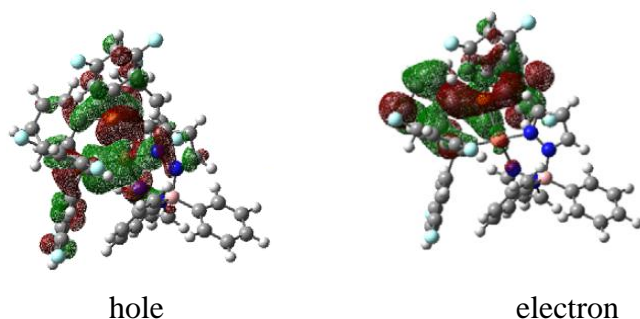

**Fig. S23** NTO pairs for the lowest triplet excited state of **2** in the optimized  $T_1$  geometry. The generation probabilities are 99.7 %.

**Table S2.** Compositions of hole and electron in  $T_1$  of **3** (the optimized  $T_1$  geometry in THF)

|                 | percentage composition (%) <sup>a</sup> |          |             |
|-----------------|-----------------------------------------|----------|-------------|
|                 | hole                                    | electron | differences |
| Cu              | 38.4                                    | 0.64     | 37.8        |
| P1              | 13.6                                    | 1.06     | 12.5        |
| P2              | 15.1                                    | 7.00     | 8.08        |
| N1              | 6.21                                    | 0.06     | 6.15        |
| N3              | 6.55                                    | 0.03     | 6.52        |
| P and N (total) | 41.5                                    | 8.15     | 33.4        |
| others          | 20.1                                    | 91.2     | -71.1       |

<sup>a</sup> In the molecular orbitals, the atomic component is evaluated by the sum of the square of the LCAO coefficients which belong to the corresponding atom; see experimental section in detail.

**Table S3.** Compositions of hole and electron in T<sub>1</sub> of **1**. (the optimized T<sub>1</sub> geometry in THF)

|                 | percentage composition (%) <sup>a</sup> |          |             |
|-----------------|-----------------------------------------|----------|-------------|
|                 | hole                                    | electron | differences |
| Cu              | 34.5                                    | 0.587    | 33.9        |
| P1              | 15.2                                    | 3.58     | 11.6        |
| P2              | 16.7                                    | 2.67     | 14.0        |
| N1              | 4.87                                    | 0.06     | 4.81        |
| N3              | 4.37                                    | 0.02     | 4.35        |
| P and N (total) | 41.1                                    | 6.33     | 35.1        |
| others          | 24.4                                    | 93.1     | -67.7       |

<sup>a</sup> In the molecular orbitals, the atomic component is evaluated by the sum of the square of the LCAO coefficients which belong to the corresponding atom; see experimental section in detail.

**Table S4.** Compositions of hole and electron in T<sub>1</sub> of **2**. (the optimized T<sub>1</sub> geometry in THF)

|                 | percentage composition (%) <sup>a</sup> |          |             |
|-----------------|-----------------------------------------|----------|-------------|
|                 | hole                                    | electron | differences |
| Cu              | 38.9                                    | 1.08     | 37.8        |
| P1              | 13.3                                    | 9.07     | 4.19        |
| P2              | 15.8                                    | 0.95     | 14.9        |
| N1              | 6.02                                    | 0.20     | 5.82        |
| N3              | 5.69                                    | 0.027    | 5.66        |
| P and N (total) | 40.8                                    | 10.3     | 30.5        |
| others          | 20.3                                    | 89.7     | -69.4       |

<sup>a</sup> In the molecular orbitals, the atomic component is evaluated by the sum of the square of the LCAO coefficients which belong to the corresponding atom; see experimental section in detail.

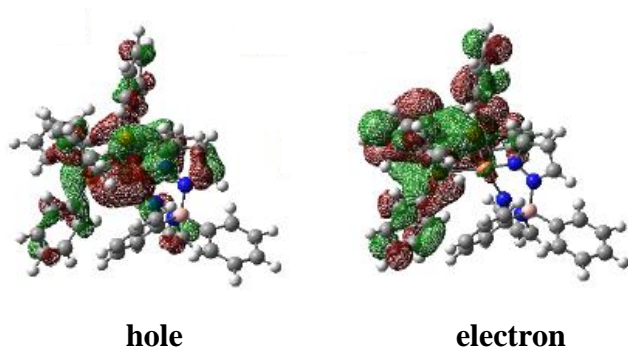

**Fig. S24** NTO pairs for the lowest triplet excited state of **1** in the optimized  $S_0$  geometry. The generation probabilities are 94.4 %.

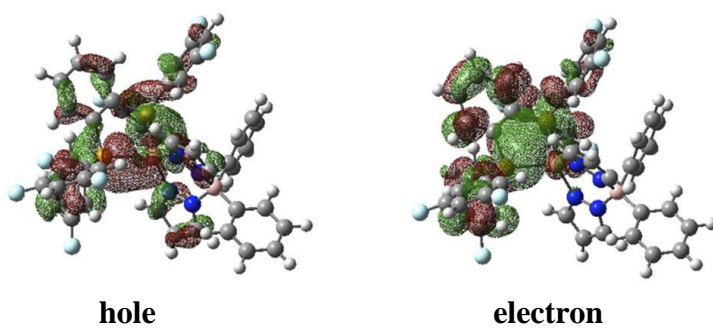

**Fig. S25** NTO pairs for the lowest triplet excited state of **2** in the optimized  $S_0$  geometry. The generation probabilities are 93.4 %.

**Table S5** Compositions of hole and electron in T<sub>1</sub> of **3** (optimized S<sub>0</sub> geometry in THF)

|                 | percentage composition (%) <sup>a</sup> |          |             |
|-----------------|-----------------------------------------|----------|-------------|
|                 | hole                                    | electron | differences |
| Cu              | 30.2                                    | 0.97     | 29.3        |
| P1              | 14.3                                    | 4.76     | 9.57        |
| P2              | 15.6                                    | 2.03     | 13.6        |
| N1              | 3.71                                    | 0.20     | 3.51        |
| N3              | 2.70                                    | 0.082    | 2.62        |
| P and N (total) | 40.8                                    | 10.3     | 30.5        |
| Others          | 29.0                                    | 88.7     | -59.7       |

<sup>a</sup> In the molecular orbitals, the atomic component is evaluated by the sum of the square of the LCAO coefficients which belong to the corresponding atom; see experimental section in detail.

**Table S6** Compositions of hole and electron in T<sub>1</sub> of **1** (optimized S<sub>0</sub> geometry in THF)

|                 | percentage composition (%) <sup>a</sup> |          |             |
|-----------------|-----------------------------------------|----------|-------------|
|                 | hole                                    | electron | differences |
| Cu              | 28.6                                    | 0.65     | 28.0        |
| P1              | 16.6                                    | 3.90     | 12.7        |
| P2              | 17.6                                    | 2.59     | 15.0        |
| N1              | 1.29                                    | 0.10     | 1.19        |
| N3              | 1.64                                    | 0.072    | 1.57        |
| P and N (total) | 37.1                                    | 6.66     | 30.4        |
| Others          | 34.3                                    | 92.7     | -58.4       |

<sup>a</sup> In the molecular orbitals, the atomic component is evaluated by the sum of the square of the LCAO coefficients which belong to the corresponding atom; see experimental section in detail.



**Table S8** Compositions of hole and electron in  $S_1$  of **3** (optimized  $S_0$  geometry in THF)

|                 | percentage composition (%) <sup>a</sup> |          |             |
|-----------------|-----------------------------------------|----------|-------------|
|                 | hole                                    | electron | differences |
| Cu              | 31.9                                    | 1.00     | 30.9        |
| P1              | 15.7                                    | 5.38     | 10.3        |
| P2              | 17.2                                    | 1.46     | 15.8        |
| N1              | 3.80                                    | 0.22     | 3.57        |
| N3              | 2.81                                    | 0.075    | 2.74        |
| P and N (total) | 39.5                                    | 6.66     | 32.8        |
| others          | 28.6                                    | 92.3     | -63.7       |

<sup>a</sup> In the molecular orbitals, the atomic component is evaluated by the sum of the square of the LCAO coefficients which belong to the corresponding atom; see experimental section in detail.

**Table S9** Compositions of hole and electron in  $S_1$  of **1** (optimized  $S_0$  geometry in THF)

|                 | percentage composition (%) <sup>a</sup> |          |             |
|-----------------|-----------------------------------------|----------|-------------|
|                 | hole                                    | electron | differences |
| Cu              | 30.5                                    | 0.23     | 30.3        |
| P1              | 18.8                                    | 3.89     | 14.9        |
| P2              | 19.9                                    | 1.62     | 18.3        |
| N1              | 1.21                                    | 0.26     | 1.18        |
| N3              | 1.61                                    | 0.017    | 1.60        |
| P and N (total) | 41.5                                    | 6.02     | 35.5        |
| others          | 28.0                                    | 93.8     | -65.8       |

<sup>a</sup> In the molecular orbitals, the atomic component is evaluated by the sum of the square of the LCAO coefficients which belong to the corresponding atom; see experimental section in detail.

**Table S10** Compositions of hole and electron in  $S_1$  of **2** (optimized  $S_0$  geometry in THF)

|                 | percentage composition (%) <sup>a</sup> |          |             |
|-----------------|-----------------------------------------|----------|-------------|
|                 | hole                                    | electron | differences |
| Cu              | 33.1                                    | 0.18     | 33.0        |
| P1              | 17.3                                    | 4.33     | 13.0        |
| P2              | 18.2                                    | 2.51     | 15.7        |
| N1              | 2.24                                    | 0.01     | 2.23        |
| N3              | 2.68                                    | 0.00     | 2.68        |
| P and N (total) | 40.4                                    | 6.02     | 35.5        |
| others          | 26.5                                    | 93.8     | -67.3       |

<sup>a</sup> In the molecular orbitals, the atomic component is evaluated by the sum of the square of the LCAO coefficients which belong to the corresponding atom; see experimental section in detail.

### 6. The angular distribution of light emission from OLEDs containing **1** – **3**.

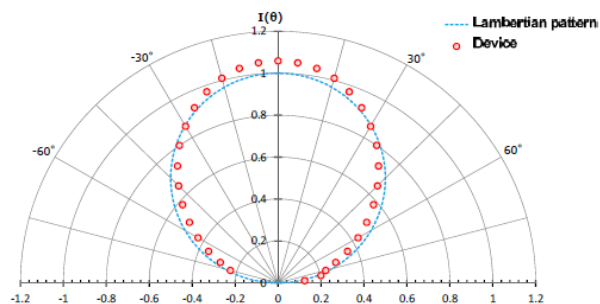

**Fig. S28** The angular distribution of light emission from the device containing **1**.

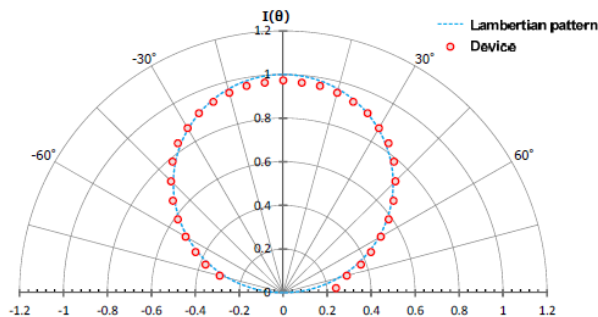

**Fig. S29** The angular distribution of light emission from the device containing **2**.

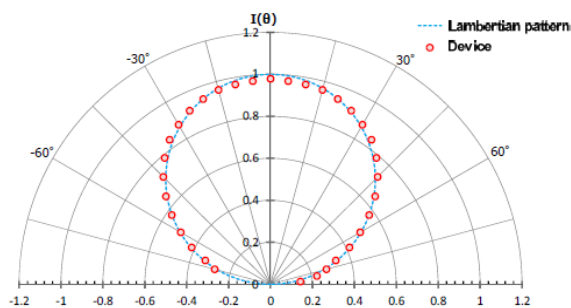

**Fig. S30** The angular distribution of light emission from the device containing **3**.

## 7. References

1. W. J. Layton, K. Niedenzu, P. M. Niedenzu and S. Trofimenko, *Inorganic Chemistry*, 1985, **24**, 1454-1457.
2. A. Tsuboyama, K. Kuge, M. Furugori, S. Okada, M. Hoshino and K. Ueno, *Inorganic Chemistry*, 2007, **46**, 1992-2001.
